# Supplementary material for: New Insights on the Male and Female Reproductive Organs of Centrorhynchus globocaudatus (Acanthocephala), Intestinal Parasite of Birds of Prey
Source: MDPI journal article supplement (doi:10.3390/cells13040356), 2024-02-18
Supplement: s1 [file s1]

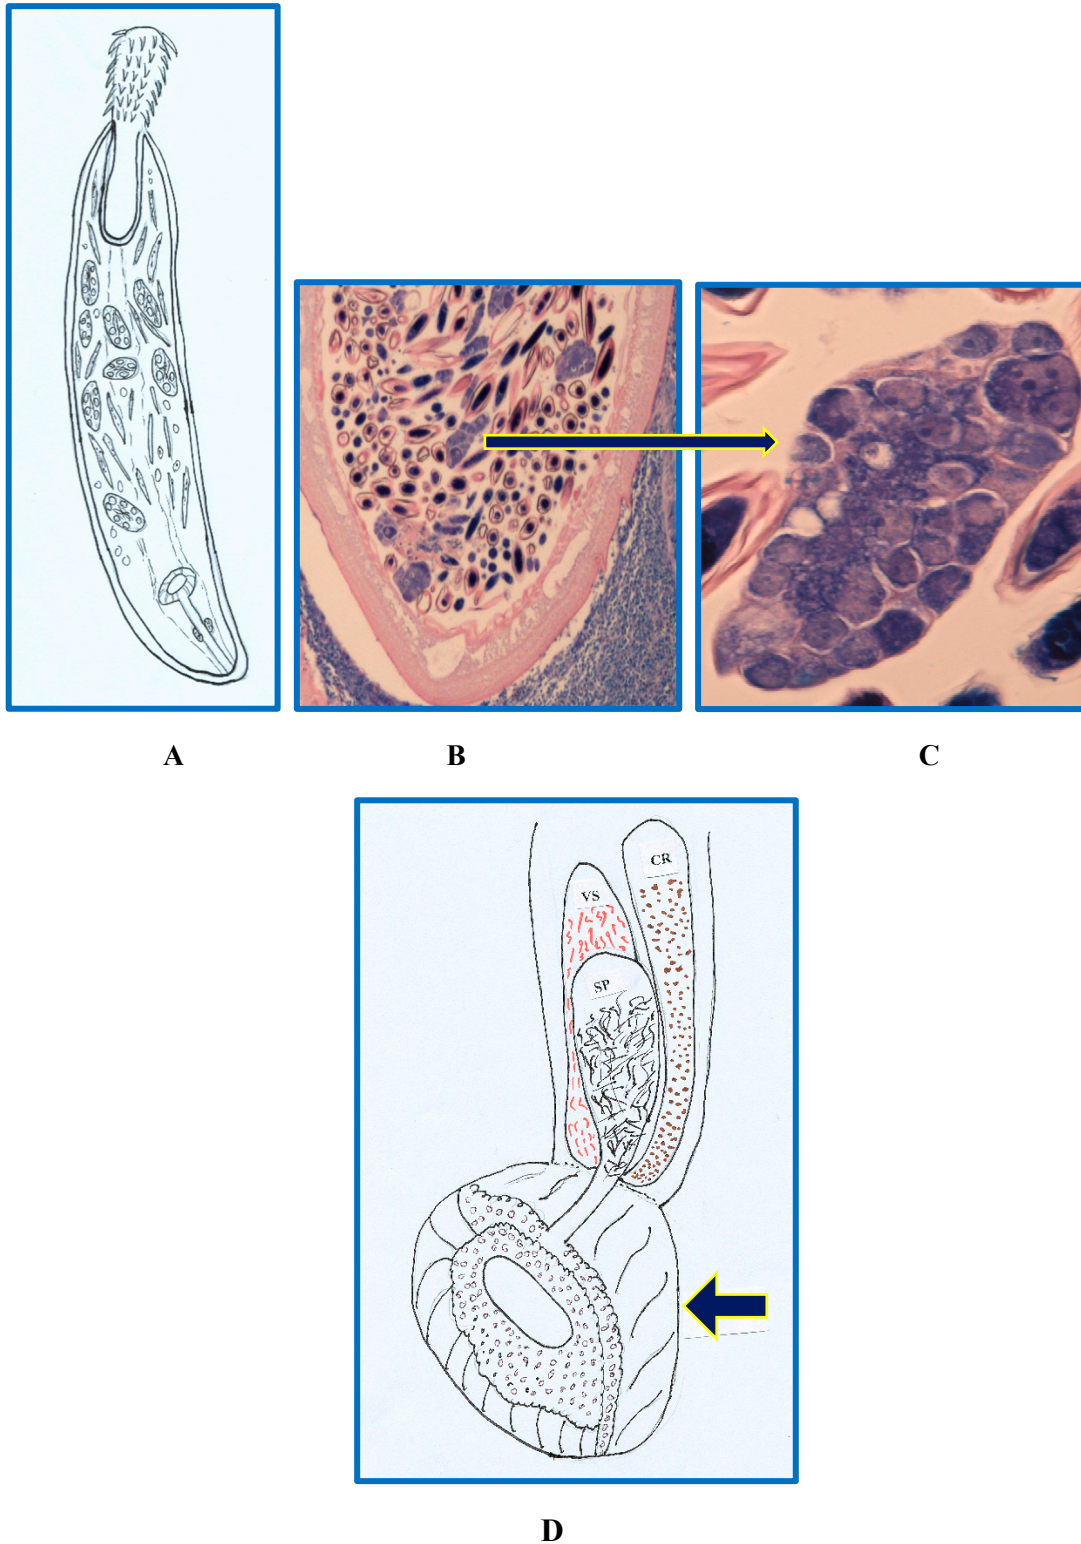

**Supplementary Figure S1.** (A) Anatomical drawing of female acanthocephalan, (B) Photo of posterior region of the female, numerous ovarian balls and acanthors are visible, (C) High magnification of one ovarian ball. (D) Anatomical drawing of posterior region of male acanthocephalan with everted bursa (arrow), SP = Saeffigen's pouch, VS = Vesicula seminalis, CR = Cement reservoir.
